# Supplementary material for: Estimating the incidence and risk factors of postpartum hemorrhage from the national ENACT network
Source: Research Square preprint supplement (doi:10.21203/rs.3.rs-7992461/v1), 2025-11-21
Supplement: Supplementary file 1 [file 7b4f13e50677059a6914c16f.docx]

**Supplementary information**

Samayamuthu MJ, Kravchenko O, Lo-Ciganic W-H, Sadhu EM, Yang Y, Visweswaran S, Gopalakrishnan V. Trends in the incidence of postpartum hemorrhage and risk factors from the ENACT network.

**Diagnosis codes, procedure codes, and medication codes used in the analyses**

| **Primary outcomes** | **ICD-9-CM diagnosis codes** | **ICD-9-CM procedure codes** | **ICD-10-CM diagnosis codes** | **ICD-10-PCS procedure codes** |
| --- | --- | --- | --- | --- |
| Delivery hospitalization | 650  669.5*  669.7*  V27* | 72*  73.22  73.59  73.6  74.0  74.1  74.2  74.3  74.4  74.99 | O80  O82  Z37* | 10E0XZZ  10E0XZ0  10D00Z1  10D00Z2  10D07Z3  10D07Z4  10D07Z5  10D07Z6  10D07Z7  10D07Z8 |
| Postpartum hemorrhage (PPH) | 666* |  | O72* |  |

*All child (downstream) codes are included.

| **Risk factors** | **ICD-9-CM diagnosis codes** | **ICD-9-CM procedure codes** | **ICD-10-CM diagnosis codes** | **ICD-10-PCS procedure codes** |
| --- | --- | --- | --- | --- |
| Prior cesarean | 654.2* |  | O34.21* |  |
| Placenta previa or accreta | 641.0*  641.1*  667* |  | O43.2*  O44* |  |
| Severe preeclampsia | 642.5* |  | O14.1*  O14.20  O14.24  O14.25 |  |
| Polyhydramnios | 657.0*  761.3 |  | O40* |  |
| Chorioamnionitis or endometritis | 615.9  658.4*  659.2*  670* |  | N71.9  O41.1*  O75.2  O86.12 |  |
| Multiple gestation | 651  652.6*  662.3  660.5  V27.2  V27.3  V27.4  V27.5  V27.6  V27.7 |  | O30*  O31  O32.9  O63.2  O66.1  O66.6  Z37.2  Z37.3  Z37.4  Z37.5  Z37.6  Z37.7 |  |
| Uterine leiomyomas | 218* |  | D25* |  |

*All child (downstream) codes are included.

| **Comorbidities** | **ICD-9-CM diagnosis codes** | **ICD-9-CM procedure codes** | **ICD-10-CM diagnosis codes** | **ICD-10-PCS procedure codes** |
| --- | --- | --- | --- | --- |
| Obesity | 278.0*  649.1*  793.91  V85.3*  V85.4* |  | E66.0*  E66.1  E66.2  E66.8  E66.9  O91.22  Z68.3  Z68.4 |  |
| Pregestational diabetes | 249*  250*  648.0* |  | E08*  E09*  E10*  E11*  E13*  O24.0*  O24.1*  O24.3*  O24.8*  O24.9* |  |
| Gestational diabetes | 648.8* |  | O24.4* |  |
| Asthma | 493* |  | J45* |  |
| Chronic hypertension | 401*  402*  403*  404*  405*  642.0*  642.1*  642.2*  642.7* |  | I10  I11  I12*  I13*  I15*  I16*  N26.2  O10*  O11* |  |
| Antepartum hemorrhage or abruption | 641.2*  641.3*  641.8*  641.9* |  | O45.0*  O45.8*  O45.9*  O46.0*  O46.8*  O46.9*  O67* |  |
| Operative vaginal delivery | 669.5* |  |  | 10D07Z3  10D07Z4  10D07Z5  10D07Z6  10D07Z7  10D07Z8 |
| Primary cesarean | 669.7* | 74.0  74.1  74.2  74.4  74.99 | O82 | 10D00Z0  10D00Z1  10D00Z2 |

*All child (downstream) codes are included.

| **Causes** | **ICD-9-CM diagnosis codes** | **ICD-9-CM procedure codes** | **ICD-10-CM diagnosis codes** | **ICD-10-PCS procedure codes** |
| --- | --- | --- | --- | --- |
| Atony | 666.1* |  | O72.1 |  |
| Trauma | 664*  665* |  | 43.2*  O70*  O71* |  |
| Tissue-related | 666.0*  666.2* |  | O72.0  O72.2 |  |
| Thrombin-induced | 666.3 |  | O72.3 |  |

*All child (downstream) codes are included.

| **Interventions** | **ICD-9-CM diagnosis codes** | **ICD-9-CM procedure codes** | **ICD-10-CM diagnosis codes** | **ICD-10-PCS procedure codes** |
| --- | --- | --- | --- | --- |
| Hysterectomy |  | 68.3*  68.4*  68.5*  68.6*  68.7*  68.8  68.9 |  | 0UT90ZZ  0UT94ZZ  0UT97ZZ  0UT98ZZ  0UT9FZZ |
| Surgical procedures (including hysterectomy) |  | 68.3*  68.4*  68.5*  68.6*  68.7*  68.8*  68.9  68.24  68.25  75.93 |  | 04LE*  04LF*  0US90ZZ  0US94ZZ  0US97ZZ  0US98ZZ  0UT90ZZ  0UT94ZZ  0UT97ZZ  0UT98ZZ  0UT9FZZ |
| Manipulative procedures |  | 75.4  75.5*  75.8  75.91  75.94 |  | 0JCB0ZZ  0JCB3ZZ  0UQC*  0UQG*  0UQM*  0US9XZZ  0W3R0ZZ  0W3R3ZZ  0W3R4ZZ  0W3R7ZZ  0W3R8ZZ  10D18Z9  2Y44X5Z |
| Blood transfusion |  | 99.0* (except 99.01)  99.00  99.02  99.03  99.04  99.05  99.06  99.07  99.08  99.09 |  | 30233H1  30233K1  30233L1  30233M1  30233N1  30233P1  30233R1  20233T1  30240H1  30240K1  30240L1  30240M1  30240N1  30240P1  30240R1  30240T1  20243H1  30243K1  30243L1  30243M1  30243N1  30243P1  30243R1  30243T1  30233N0  30233P0  30240N0  30240P0  30243N0  30243P0 |
|  | **RxNorm codes** |  |  |  |
| Medications | 7824  93672  242125  371284  371879  372050  374179  377087  378095  577490  727720  1729374  1789851  1791720 |  |  |  |

*All child (downstream) codes are included.
